# Supplementary material for: Observations and model calculations of trace gas scavenging in a dense Saharan dust plume during MINATROC
Source: Copernicus journal article supplement (doi:10.5194/acp-5-1787-2005), 2005-07-20
Supplement: Supplementary file 1 [file acp-5-1787-2005-supplement.pdf]

# The Chemical Mechanism of MECCA

## used for the MINATROC box model calculations in the accompanying paper

Table 1: Gas phase reactions

| #     | labels | reaction                                  | rate constant                                        | reference                                             |
|-------|--------|-------------------------------------------|------------------------------------------------------|-------------------------------------------------------|
| G1000 | StTrG  | $O_2 + O(^1D) \rightarrow O(^3P) + O_2$   | $3.2E-11*EXP(70./temp)$                              | Sander et al. (2003)                                  |
| G1001 | StTrG  | $O_2 + O(^3P) \rightarrow O_3$            | $6.E-34*((temp/300.)**(-2.4))*cair$                  | Sander et al. (2003)                                  |
| G2100 | StTrG  | $H + O_2 \rightarrow HO_2$                | $k\_3rd(temp, cair, 5.7E-32, 1.6, 7.5E-11, 0., 0.6)$ | Sander et al. (2003)                                  |
| G2104 | StTrG  | $OH + O_3 \rightarrow HO_2$               | $1.7E-12*EXP(-940./temp)$                            | Sander et al. (2003)                                  |
| G2105 | StTrG  | $OH + H_2 \rightarrow H_2O + H$           | $5.5E-12*EXP(-2000./temp)$                           | Sander et al. (2003)                                  |
| G2107 | StTrG  | $HO_2 + O_3 \rightarrow OH$               | $1.E-14*EXP(-490./temp)$                             | Sander et al. (2003)                                  |
| G2109 | StTrG  | $HO_2 + OH \rightarrow H_2O$              | $4.8E-11*EXP(250./temp)$                             | Sander et al. (2003)                                  |
| G2110 | StTrG  | $HO_2 + HO_2 \rightarrow H_2O_2$          | $k\_HO2\_HO2$                                        | Christensen et al. (2002), Kircher and Sander (1984)* |
| G2111 | StTrG  | $H_2O + O(^1D) \rightarrow 2 OH$          | $2.2E-10$                                            | Sander et al. (2003)                                  |
| G2112 | StTrG  | $H_2O_2 + OH \rightarrow H_2O + HO_2$     | $2.9E-12*EXP(-160./temp)$                            | Sander et al. (2003)                                  |
| G3101 | StTrG  | $N_2 + O(^1D) \rightarrow O(^3P) + N_2$   | $1.8E-11*EXP(110./temp)$                             | Sander et al. (2003)                                  |
| G3103 | StTrGN | $NO + O_3 \rightarrow NO_2 + O_2$         | $3.E-12*EXP(-1500./temp)$                            | Sander et al. (2003)                                  |
| G3106 | StTrGN | $NO_2 + O_3 \rightarrow NO_3 + O_2$       | $1.2E-13*EXP(-2450./temp)$                           | Sander et al. (2003)                                  |
| G3108 | StTrGN | $NO_3 + NO \rightarrow 2 NO_2$            | $1.5E-11*EXP(170./temp)$                             | Sander et al. (2003)                                  |
| G3109 | StTrGN | $NO_3 + NO_2 \rightarrow N_2O_5$          | $k\_NO3\_NO2$                                        | Sander et al. (2003)*                                 |
| G3110 | StTrGN | $N_2O_5 \rightarrow NO_2 + NO_3$          | $k\_NO3\_NO2/(3.E-27*EXP(10990./temp))$              | Sander et al. (2003)*                                 |
| G3200 | TrG    | $NO + OH \rightarrow HONO$                | $k\_3rd(temp, cair, 7.E-31, 2.6, 3.6E-11, 0.1, 0.6)$ | Sander et al. (2003)                                  |
| G3201 | StTrGN | $NO + HO_2 \rightarrow NO_2 + OH$         | $3.5E-12*EXP(250./temp)$                             | Sander et al. (2003)                                  |
| G3202 | StTrGN | $NO_2 + OH \rightarrow HNO_3$             | $k\_3rd(temp, cair, 2.E-30, 3., 2.5E-11, 0., 0.6)$   | Sander et al. (2003)                                  |
| G3203 | StTrGN | $NO_2 + HO_2 \rightarrow HNO_4$           | $k\_NO2\_HO2$                                        | Sander et al. (2003)                                  |
| G3204 | TrGN   | $NO_3 + HO_2 \rightarrow NO_2 + OH + O_2$ | $3.5E-12$                                            | Sander et al. (2003)                                  |
| G3205 | TrG    | $HONO + OH \rightarrow NO_2 + H_2O$       | $1.8E-11*EXP(-390./temp)$                            | Sander et al. (2003)                                  |
| G3206 | StTrGN | $HNO_3 + OH \rightarrow H_2O + NO_3$      | $k\_HNO3\_OH$                                        | Sander et al. (2003)*                                 |
| G3207 | StTrGN | $HNO_4 \rightarrow NO_2 + HO_2$           | $k\_NO2\_HO2/(2.1E-27*EXP(10900./temp))$             | Sander et al. (2003)*                                 |
| G3208 | StTrGN | $HNO_4 + OH \rightarrow NO_2 + H_2O$      | $1.3E-12*EXP(380./temp)$                             | Sander et al. (2003)                                  |
| G4101 | StTrG  | $CH_4 + OH \rightarrow CH_3O_2 + H_2O$    | $1.85E-20*EXP(2.82*log(temp)-987./temp)$             | Atkinson (2003)*                                      |

Table 1: Gas phase reactions (... continued)

| #      | labels | reaction                                                                                                                                                  | rate constant                                                                             | reference                 |
|--------|--------|-----------------------------------------------------------------------------------------------------------------------------------------------------------|-------------------------------------------------------------------------------------------|---------------------------|
| G4102  | TrG    | $\text{CH}_3\text{OH} + \text{OH} \rightarrow \text{HCHO} + \text{HO}_2$                                                                                  | $7.3\text{E}-12*\text{EXP}(-620./\text{temp})$                                            | Sander et al. (2003)      |
| G4103a | StTrG  | $\text{CH}_3\text{O}_2 + \text{HO}_2 \rightarrow \text{CH}_3\text{OOH}$                                                                                   | $4.1\text{E}-13*\text{EXP}(750./\text{temp})/(1.+1./497.7*\text{EXP}(1160./\text{temp}))$ | Sander et al. (2003)*     |
| G4103b | StTrG  | $\text{CH}_3\text{O}_2 + \text{HO}_2 \rightarrow \text{HCHO} + \text{H}_2\text{O} + \text{O}_2$                                                           | $4.1\text{E}-13*\text{EXP}(750./\text{temp})/(1.+497.7*\text{EXP}(-1160./\text{temp}))$   | Sander et al. (2003)*     |
| G4104  | StTrGN | $\text{CH}_3\text{O}_2 + \text{NO} \rightarrow \text{HCHO} + \text{NO}_2 + \text{HO}_2$                                                                   | $2.8\text{E}-12*\text{EXP}(300./\text{temp})$                                             | Sander et al. (2003)      |
| G4105  | TrGN   | $\text{CH}_3\text{O}_2 + \text{NO}_3 \rightarrow \text{HCHO} + \text{HO}_2 + \text{NO}_2$                                                                 | $1.3\text{E}-12$                                                                          | Atkinson et al. (1999)    |
| G4106a | StTrG  | $\text{CH}_3\text{O}_2 + \text{CH}_3\text{O}_2 \rightarrow 2 \text{HCHO} + 2 \text{HO}_2$                                                                 | $9.5\text{E}-14*\text{EXP}(390./\text{temp})/(1.+1./26.2*\text{EXP}(1130./\text{temp}))$  | Sander et al. (2003)      |
| G4106b | StTrG  | $\text{CH}_3\text{O}_2 + \text{CH}_3\text{O}_2 \rightarrow \text{HCHO} + \text{CH}_3\text{OH}$                                                            | $9.5\text{E}-14*\text{EXP}(390./\text{temp})/(1.+26.2*\text{EXP}(-1130./\text{temp}))$    | Sander et al. (2003)      |
| G4107  | StTrG  | $\text{CH}_3\text{OOH} + \text{OH} \rightarrow .7 \text{CH}_3\text{O}_2 + .3 \text{HCHO} + .3 \text{OH} + \text{H}_2\text{O}$                             | k_CH300H_OH                                                                               | Sander et al. (2003)*     |
| G4108  | StTrG  | $\text{HCHO} + \text{OH} \rightarrow \text{CO} + \text{H}_2\text{O} + \text{HO}_2$                                                                        | $9.52\text{E}-18*\text{EXP}(2.03*\log(\text{temp})+636./\text{temp})$                     | Sivakumaran et al. (2003) |
| G4109  | TrGN   | $\text{HCHO} + \text{NO}_3 \rightarrow \text{HNO}_3 + \text{CO} + \text{HO}_2$                                                                            | $3.4\text{E}-13*\text{EXP}(-1900./\text{temp})$                                           | Sander et al. (2003)*     |
| G4110  | StTrG  | $\text{CO} + \text{OH} \rightarrow \text{H} + \text{CO}_2$                                                                                                | $1.57\text{E}-13+\text{cair}*3.54\text{E}-33$                                             | McCabe et al. (2001)      |
| G4111  | TrG    | $\text{HCOOH} + \text{OH} \rightarrow \text{HO}_2$                                                                                                        | $4.\text{E}-13$                                                                           | Sander et al. (2003)      |
| G4200  | TrGC   | $\text{C}_2\text{H}_6 + \text{OH} \rightarrow \text{C}_2\text{H}_5\text{O}_2 + \text{H}_2\text{O}$                                                        | $1.49\text{E}-17*\text{temp}*\text{temp}*\text{EXP}(-499./\text{temp})$                   | Atkinson (2003)           |
| G4201  | TrGC   | $\text{C}_2\text{H}_4 + \text{O}_3 \rightarrow \text{HCHO} + .22 \text{HO}_2 + .12 \text{OH} + .23 \text{CO} + .54 \text{HCOOH} + .1 \text{H}_2$          | $1.2\text{E}-14*\text{EXP}(-2630./\text{temp})$                                           | Sander et al. (2003)*     |
| G4202  | TrGC   | $\text{C}_2\text{H}_4 + \text{OH} \rightarrow .6666667 \text{CH}_3\text{CH}(\text{O}_2)\text{CH}_2\text{OH}$                                              | k_3rd(temp, cair, 1.E-28, 0.8, 8.8E-12, 0., 0.6)                                          | Sander et al. (2003)      |
| G4203  | TrGC   | $\text{C}_2\text{H}_5\text{O}_2 + \text{HO}_2 \rightarrow \text{C}_2\text{H}_5\text{OOH}$                                                                 | $7.5\text{E}-13*\text{EXP}(700./\text{temp})$                                             | Sander et al. (2003)      |
| G4204  | TrGNC  | $\text{C}_2\text{H}_5\text{O}_2 + \text{NO} \rightarrow \text{CH}_3\text{CHO} + \text{HO}_2 + \text{NO}_2$                                                | $2.6\text{E}-12*\text{EXP}(365./\text{temp})$                                             | Sander et al. (2003)      |
| G4205  | TrGNC  | $\text{C}_2\text{H}_5\text{O}_2 + \text{NO}_3 \rightarrow \text{CH}_3\text{CHO} + \text{HO}_2 + \text{NO}_2$                                              | $2.3\text{E}-12$                                                                          | Atkinson et al. (1999)    |
| G4206  | TrGC   | $\text{C}_2\text{H}_5\text{O}_2 + \text{CH}_3\text{O}_2 \rightarrow .75 \text{HCHO} + \text{HO}_2 + .75 \text{CH}_3\text{CHO} + .25 \text{CH}_3\text{OH}$ | $1.6\text{E}-13*\text{EXP}(195./\text{temp})$                                             | see note                  |
| G4207  | TrGC   | $\text{C}_2\text{H}_5\text{OOH} + \text{OH} \rightarrow .3 \text{C}_2\text{H}_5\text{O}_2 + .7 \text{CH}_3\text{CHO} + .7 \text{OH}$                      | k_CH300H_OH                                                                               | see note                  |
| G4208  | TrGC   | $\text{CH}_3\text{CHO} + \text{OH} \rightarrow \text{CH}_3\text{C}(\text{O})\text{OO} + \text{H}_2\text{O}$                                               | $5.6\text{E}-12*\text{EXP}(270./\text{temp})$                                             | Sander et al. (2003)      |
| G4209  | TrGNC  | $\text{CH}_3\text{CHO} + \text{NO}_3 \rightarrow \text{CH}_3\text{C}(\text{O})\text{OO} + \text{HNO}_3$                                                   | $1.4\text{E}-12*\text{EXP}(-1900./\text{temp})$                                           | Sander et al. (2003)      |
| G4210  | TrGC   | $\text{CH}_3\text{COOH} + \text{OH} \rightarrow \text{CH}_3\text{O}_2$                                                                                    | $4.\text{E}-13*\text{EXP}(200./\text{temp})$                                              | Sander et al. (2003)      |
| G4211a | TrGC   | $\text{CH}_3\text{C}(\text{O})\text{OO} + \text{HO}_2 \rightarrow \text{CH}_3\text{C}(\text{O})\text{OOH}$                                                | $4.3\text{E}-13*\text{EXP}(1040./\text{temp})/(1.+1./37.*\text{EXP}(660./\text{temp}))$   | Tyndall et al. (2001)     |
| G4211b | TrGC   | $\text{CH}_3\text{C}(\text{O})\text{OO} + \text{HO}_2 \rightarrow \text{CH}_3\text{COOH} + \text{O}_3$                                                    | $4.3\text{E}-13*\text{EXP}(1040./\text{temp})/(1.+37.*\text{EXP}(-660./\text{temp}))$     | Tyndall et al. (2001)     |
| G4212  | TrGNC  | $\text{CH}_3\text{C}(\text{O})\text{OO} + \text{NO} \rightarrow \text{CH}_3\text{O}_2 + \text{NO}_2$                                                      | $8.1\text{E}-12*\text{EXP}(270./\text{temp})$                                             | Tyndall et al. (2001)     |

Table 1: Gas phase reactions (... continued)

| #      | labels | reaction                                                                                                                                                                                                                                                                                                                                                  | rate constant                                                                     | reference                                              |
|--------|--------|-----------------------------------------------------------------------------------------------------------------------------------------------------------------------------------------------------------------------------------------------------------------------------------------------------------------------------------------------------------|-----------------------------------------------------------------------------------|--------------------------------------------------------|
| G4213  | TrGNC  | $\text{CH}_3\text{C}(\text{O})\text{OO} + \text{NO}_2 \rightarrow \text{PAN}$                                                                                                                                                                                                                                                                             | k_PA_NO2                                                                          | Tyndall et al. (2001)                                  |
| G4214  | TrGNC  | $\text{CH}_3\text{C}(\text{O})\text{OO} + \text{NO}_3 \rightarrow \text{CH}_3\text{O}_2 + \text{NO}_2$                                                                                                                                                                                                                                                    | 4.E-12                                                                            | Canosa-Mas et al. (1996)                               |
| G4215a | TrGC   | $\text{CH}_3\text{C}(\text{O})\text{OO} + \text{CH}_3\text{O}_2 \rightarrow \text{HCHO} + \text{HO}_2 + \text{CH}_3\text{O}_2 + \text{CO}_2$                                                                                                                                                                                                              | $0.9 \cdot 2.E-12 \cdot \text{EXP}(500./\text{temp})$                             | Sander et al. (2003)                                   |
| G4215b | TrGC   | $\text{CH}_3\text{C}(\text{O})\text{OO} + \text{CH}_3\text{O}_2 \rightarrow \text{CH}_3\text{COOH} + \text{HCHO} + \text{CO}_2$                                                                                                                                                                                                                           | $0.1 \cdot 2.E-12 \cdot \text{EXP}(500./\text{temp})$                             | Sander et al. (2003)                                   |
| G4216  | TrGC   | $\text{CH}_3\text{C}(\text{O})\text{OO} + \text{C}_2\text{H}_5\text{O}_2 \rightarrow .82 \text{CH}_3\text{O}_2 + \text{CH}_3\text{CHO} + .82 \text{HO}_2 + .18 \text{CH}_3\text{COOH}$                                                                                                                                                                    | $4.9E-12 \cdot \text{EXP}(211./\text{temp})$                                      | Atkinson et al. (1999), Kirchner and Stockwell (1996)* |
| G4217  | TrGC   | $\text{CH}_3\text{C}(\text{O})\text{OO} + \text{CH}_3\text{C}(\text{O})\text{OO} \rightarrow 2 \text{CH}_3\text{O}_2 + 2 \text{CO}_2 + \text{O}_2$                                                                                                                                                                                                        | $2.5E-12 \cdot \text{EXP}(500./\text{temp})$                                      | Tyndall et al. (2001)                                  |
| G4218  | TrGC   | $\text{CH}_3\text{C}(\text{O})\text{OOH} + \text{OH} \rightarrow \text{CH}_3\text{C}(\text{O})\text{OO}$                                                                                                                                                                                                                                                  | k_CH300H_OH                                                                       | see note                                               |
| G4219  | TrGNC  | $\text{NACA} + \text{OH} \rightarrow \text{NO}_2 + \text{HCHO} + \text{CO}$                                                                                                                                                                                                                                                                               | $5.6E-12 \cdot \text{EXP}(270./\text{temp})$                                      | see note                                               |
| G4220  | TrGNC  | $\text{PAN} + \text{OH} \rightarrow \text{HCHO} + \text{NO}_2$                                                                                                                                                                                                                                                                                            | 2.E-14                                                                            | see note                                               |
| G4221  | TrGNC  | $\text{PAN} \rightarrow \text{CH}_3\text{C}(\text{O})\text{OO} + \text{NO}_2$                                                                                                                                                                                                                                                                             | k_PAN_M                                                                           | Sander et al. (2003)*                                  |
| G4300  | TrGC   | $\text{C}_3\text{H}_8 + \text{OH} \rightarrow .82 \text{C}_3\text{H}_7\text{O}_2 + .18 \text{C}_2\text{H}_5\text{O}_2 + \text{H}_2\text{O}$                                                                                                                                                                                                               | $1.65E-17 \cdot \text{temp} \cdot \text{temp} \cdot \text{EXP}(-87./\text{temp})$ | Atkinson (2003)                                        |
| G4301  | TrGC   | $\text{C}_3\text{H}_6 + \text{O}_3 \rightarrow .57 \text{HCHO} + .47 \text{CH}_3\text{CHO} + .33 \text{OH} + .26 \text{HO}_2 + .07 \text{CH}_3\text{O}_2 + .06 \text{C}_2\text{H}_5\text{O}_2 + .23 \text{CH}_3\text{C}(\text{O})\text{OO} + .04 \text{CH}_3\text{COCHO} + .06 \text{CH}_4 + .31 \text{CO} + .22 \text{HCOOH} + .03 \text{CH}_3\text{OH}$ | $6.5E-15 \cdot \text{EXP}(-1900./\text{temp})$                                    | Sander et al. (2003)*                                  |
| G4302  | TrGC   | $\text{C}_3\text{H}_6 + \text{OH} \rightarrow \text{CH}_3\text{CH}(\text{O}_2)\text{CH}_2\text{OH}$                                                                                                                                                                                                                                                       | k_3rd(temp, cair, 8.E-27, 3.5, 3.E-11, 0., 0.5)                                   | Atkinson et al. (1999)                                 |
| G4303  | TrGNC  | $\text{C}_3\text{H}_6 + \text{NO}_3 \rightarrow \text{ONIT}$                                                                                                                                                                                                                                                                                              | $4.6E-13 \cdot \text{EXP}(-1155./\text{temp})$                                    | Atkinson et al. (1999)                                 |
| G4304  | TrGC   | $\text{C}_3\text{H}_7\text{O}_2 + \text{HO}_2 \rightarrow \text{C}_3\text{H}_7\text{OOH}$                                                                                                                                                                                                                                                                 | k_Pr02_HO2                                                                        | Atkinson (1997)*                                       |
| G4305  | TrGNC  | $\text{C}_3\text{H}_7\text{O}_2 + \text{NO} \rightarrow .96 \text{CH}_3\text{COCH}_3 + .96 \text{HO}_2 + .96 \text{NO}_2 + .04 \text{C}_3\text{H}_7\text{ONO}_2$                                                                                                                                                                                          | k_Pr02_NO                                                                         | Atkinson et al. (1999)*                                |
| G4306  | TrGC   | $\text{C}_3\text{H}_7\text{O}_2 + \text{CH}_3\text{O}_2 \rightarrow \text{CH}_3\text{COCH}_3 + .8 \text{HCHO} + .8 \text{HO}_2 + .2 \text{CH}_3\text{OH}$                                                                                                                                                                                                 | k_Pr02_CH3O2                                                                      | Kirchner and Stockwell (1996)                          |
| G4307  | TrGC   | $\text{C}_3\text{H}_7\text{OOH} + \text{OH} \rightarrow .3 \text{C}_3\text{H}_7\text{O}_2 + .7 \text{CH}_3\text{COCH}_3 + .7 \text{OH}$                                                                                                                                                                                                                   | k_CH300H_OH                                                                       | see note                                               |
| G4308  | TrGC   | $\text{CH}_3\text{CH}(\text{O}_2)\text{CH}_2\text{OH} + \text{HO}_2 \rightarrow \text{C}_3\text{H}_6\text{OOH}$                                                                                                                                                                                                                                           | $6.5E-13 \cdot \text{EXP}(650./\text{temp})$                                      | Müller and Brasseur (1995)                             |
| G4309  | TrGNC  | $\text{CH}_3\text{CH}(\text{O}_2)\text{CH}_2\text{OH} + \text{NO} \rightarrow .98 \text{CH}_3\text{CHO} + .98 \text{HCHO} + .98 \text{HO}_2 + .98 \text{NO}_2 + .02 \text{ONIT}$                                                                                                                                                                          | $4.2E-12 \cdot \text{EXP}(180./\text{temp})$                                      | Müller and Brasseur (1995)*                            |
| G4310  | TrGC   | $\text{C}_3\text{H}_6\text{OOH} + \text{OH} \rightarrow .5 \text{CH}_3\text{CH}(\text{O}_2)\text{CH}_2\text{OH} + .5 \text{CH}_3\text{COCH}_2\text{OH} + .5 \text{OH} + \text{H}_2\text{O}$                                                                                                                                                               | $3.8E-12 \cdot \text{EXP}(200./\text{temp})$                                      | Müller and Brasseur (1995)                             |
| G4311  | TrGC   | $\text{CH}_3\text{COCH}_3 + \text{OH} \rightarrow \text{CH}_3\text{COCH}_2\text{O}_2 + \text{H}_2\text{O}$                                                                                                                                                                                                                                                | $1.33E-13 + 3.82E-11 \cdot \text{EXP}(-2000./\text{temp})$                        | Sander et al. (2003)                                   |
| G4312  | TrGC   | $\text{CH}_3\text{COCH}_2\text{O}_2 + \text{HO}_2 \rightarrow \text{CH}_3\text{COCH}_2\text{O}_2\text{H}$                                                                                                                                                                                                                                                 | $8.6E-13 \cdot \text{EXP}(700./\text{temp})$                                      | Tyndall et al. (2001)                                  |
| G4313  | TrGNC  | $\text{CH}_3\text{COCH}_2\text{O}_2 + \text{NO} \rightarrow \text{NO}_2 + \text{CH}_3\text{C}(\text{O})\text{OO} + \text{HCHO}$                                                                                                                                                                                                                           | $2.9E-12 \cdot \text{EXP}(300./\text{temp})$                                      | Sander et al. (2003)                                   |

Table 1: Gas phase reactions (... continued)

| #     | labels | reaction                                                                                                                                                                                                                                                           | rate constant                                                                                              | reference              |
|-------|--------|--------------------------------------------------------------------------------------------------------------------------------------------------------------------------------------------------------------------------------------------------------------------|------------------------------------------------------------------------------------------------------------|------------------------|
| G4314 | TrGC   | $\text{CH}_3\text{COCH}_2\text{O}_2 + \text{CH}_3\text{O}_2 \rightarrow .5 \text{CH}_3\text{COCHO} + .5 \text{CH}_3\text{OH}$<br>+ .3 $\text{CH}_3\text{C}(\text{O})\text{OO} + .8 \text{HCHO} + .3 \text{HO}_2 + .2$<br>$\text{CH}_3\text{COCH}_2\text{OH}$       | $7.5\text{E}-13*\text{EXP}(500./\text{temp})$                                                              | Tyndall et al. (2001)  |
| G4315 | TrGC   | $\text{CH}_3\text{COCH}_2\text{O}_2\text{H} + \text{OH} \rightarrow .3 \text{CH}_3\text{COCH}_2\text{O}_2 + .7$<br>$\text{CH}_3\text{COCHO} + .7 \text{OH}$                                                                                                        | k_CH300H_OH                                                                                                | see note               |
| G4316 | TrGC   | $\text{CH}_3\text{COCH}_2\text{OH} + \text{OH} \rightarrow \text{CH}_3\text{COCHO} + \text{HO}_2$                                                                                                                                                                  | 3.E-12                                                                                                     | Atkinson et al. (1999) |
| G4317 | TrGC   | $\text{CH}_3\text{COCHO} + \text{OH} \rightarrow \text{CH}_3\text{C}(\text{O})\text{OO} + \text{CO}$                                                                                                                                                               | $8.4\text{E}-13*\text{EXP}(830./\text{temp})$                                                              | Tyndall et al. (1995)  |
| G4318 | TrGNC  | $\text{MPAN} + \text{OH} \rightarrow \text{CH}_3\text{COCH}_2\text{OH} + \text{NO}_2$                                                                                                                                                                              | 3.2E-11                                                                                                    | Orlando et al. (2002)  |
| G4319 | TrGNC  | $\text{MPAN} \rightarrow \text{MVKO}_2 + \text{NO}_2$                                                                                                                                                                                                              | k_PAN_M                                                                                                    | see note               |
| G4320 | TrGNC  | $\text{C}_3\text{H}_7\text{ONO}_2 + \text{OH} \rightarrow \text{CH}_3\text{COCH}_3 + \text{NO}_2$                                                                                                                                                                  | $6.2\text{E}-13*\text{EXP}(-230./\text{temp})$                                                             | Atkinson et al. (1999) |
| G4400 | TrGC   | $\text{C}_4\text{H}_{10} + \text{OH} \rightarrow \text{C}_4\text{H}_9\text{O}_2 + \text{H}_2\text{O}$                                                                                                                                                              | $1.81\text{E}-17*\text{temp}*\text{temp}*\text{EXP}(114./\text{temp})$                                     | Atkinson (2003)        |
| G4401 | TrGC   | $\text{C}_4\text{H}_9\text{O}_2 + \text{CH}_3\text{O}_2 \rightarrow .88 \text{CH}_3\text{COC}_2\text{H}_5 + .68 \text{HCHO} +$<br>$1.23 \text{HO}_2 + .12 \text{CH}_3\text{CHO} + .12 \text{C}_2\text{H}_5\text{O}_2 + .18 \text{CH}_3\text{OH}$                   | k_Pr02_CH302                                                                                               | see note               |
| G4402 | TrGC   | $\text{C}_4\text{H}_9\text{O}_2 + \text{HO}_2 \rightarrow \text{C}_4\text{H}_9\text{OOH}$                                                                                                                                                                          | k_Pr02_H02                                                                                                 | see note               |
| G4403 | TrGNC  | $\text{C}_4\text{H}_9\text{O}_2 + \text{NO} \rightarrow .84 \text{NO}_2 + .56 \text{CH}_3\text{COC}_2\text{H}_5 + .56 \text{HO}_2$<br>+ .28 $\text{C}_2\text{H}_5\text{O}_2 + .84 \text{CH}_3\text{CHO} + .16 \text{ONIT}$                                         | k_Pr02_NO                                                                                                  | see note               |
| G4404 | TrGC   | $\text{C}_4\text{H}_9\text{OOH} + \text{OH} \rightarrow .15 \text{C}_4\text{H}_9\text{O}_2 + .85 \text{CH}_3\text{COC}_2\text{H}_5 + .85$<br>$\text{OH} + .85 \text{H}_2\text{O}$                                                                                  | k_CH300H_OH                                                                                                | see note               |
| G4405 | TrGC   | $\text{MVK} + \text{O}_3 \rightarrow .45 \text{HCOOH} + .9 \text{CH}_3\text{COCHO} + .1$<br>$\text{CH}_3\text{C}(\text{O})\text{OO} + .19 \text{OH} + .22 \text{CO} + .32 \text{HO}_2$                                                                             | $.5*(1.36\text{E}-15*\text{EXP}(-2112./\text{temp})$<br>$+7.51\text{E}-16*\text{EXP}(-1521./\text{temp}))$ | Pöschl et al. (2000)   |
| G4406 | TrGC   | $\text{MVK} + \text{OH} \rightarrow \text{MVKO}_2$                                                                                                                                                                                                                 | $.5*(4.1\text{E}-12*\text{EXP}(452./\text{temp})$<br>$+1.9\text{E}-11*\text{EXP}(175./\text{temp}))$       | Pöschl et al. (2000)   |
| G4407 | TrGC   | $\text{MVKO}_2 + \text{HO}_2 \rightarrow \text{MVKOOH}$                                                                                                                                                                                                            | $1.82\text{E}-13*\text{EXP}(1300./\text{temp})$                                                            | Pöschl et al. (2000)   |
| G4408 | TrGNC  | $\text{MVKO}_2 + \text{NO} \rightarrow \text{NO}_2 + .25 \text{CH}_3\text{C}(\text{O})\text{OO} + .25$<br>$\text{CH}_3\text{COCH}_2\text{OH} + .75 \text{HCHO} + .25 \text{CO} + .75 \text{HO}_2 + .5$<br>$\text{CH}_3\text{COCHO}$                                | $2.54\text{E}-12*\text{EXP}(360./\text{temp})$                                                             | Pöschl et al. (2000)   |
| G4409 | TrGNC  | $\text{MVKO}_2 + \text{NO}_2 \rightarrow \text{MPAN}$                                                                                                                                                                                                              | $.25*k\_3\text{rd}(\text{temp}, \text{cair}, 9.7\text{E}-29, 5.6,$<br>$9.3\text{E}-12, 1.5, 0.6)$          | Pöschl et al. (2000)*  |
| G4410 | TrGC   | $\text{MVKO}_2 + \text{CH}_3\text{O}_2 \rightarrow .5 \text{CH}_3\text{COCHO} + .375$<br>$\text{CH}_3\text{COCH}_2\text{OH} + .125 \text{CH}_3\text{C}(\text{O})\text{OO} + 1.125 \text{HCHO}$<br>+ .875 $\text{HO}_2 + .125 \text{CO} + .25 \text{CH}_3\text{OH}$ | 2.E-12                                                                                                     | von Kuhlmann (2001)    |
| G4411 | TrGC   | $\text{MVKO}_2 + \text{MVKO}_2 \rightarrow \text{CH}_3\text{COCH}_2\text{OH} + \text{CH}_3\text{COCHO} +$<br>$.5 \text{CO} + .5 \text{HCHO} + \text{HO}_2$                                                                                                         | 2.E-12                                                                                                     | Pöschl et al. (2000)   |
| G4412 | TrGC   | $\text{MVKOOH} + \text{OH} \rightarrow \text{MVKO}_2$                                                                                                                                                                                                              | 3.E-11                                                                                                     | Pöschl et al. (2000)   |
| G4413 | TrGC   | $\text{CH}_3\text{COC}_2\text{H}_5 + \text{OH} \rightarrow \text{MEKO}_2$                                                                                                                                                                                          | $1.3\text{E}-12*\text{EXP}(-25./\text{temp})$                                                              | Atkinson et al. (1999) |

Table 1: Gas phase reactions (... continued)

| #     | labels | reaction                                                                                                                                                                                                       | rate constant             | reference               |
|-------|--------|----------------------------------------------------------------------------------------------------------------------------------------------------------------------------------------------------------------|---------------------------|-------------------------|
| G4414 | TrGC   | MEKO2 + HO <sub>2</sub> → MEKOOH                                                                                                                                                                               | k_Pr02_H02                | see note                |
| G4415 | TrGNC  | MEKO2 + NO → .985 CH <sub>3</sub> CHO + .985 CH <sub>3</sub> C(O)OO + .985 NO <sub>2</sub> + .015 ONIT                                                                                                         | k_Pr02_NO                 | see note                |
| G4416 | TrGC   | MEKOOH + OH → .8 MeCOCO + .8 OH + .2 MEKO2                                                                                                                                                                     | k_CH300H_OH               | see note                |
| G4417 | TrGNC  | ONIT + OH → CH <sub>3</sub> COC <sub>2</sub> H <sub>5</sub> + NO <sub>2</sub> + H <sub>2</sub> O                                                                                                               | 1.7E-12                   | Atkinson et al. (1999)* |
| G4500 | TrGC   | ISOP + O <sub>3</sub> → .28 HCOOH + .65 MVK + .1 MVKO2 + .1 CH <sub>3</sub> C(O)OO + .14 CO + .58 HCHO + .09 H <sub>2</sub> O <sub>2</sub> + .08 CH <sub>3</sub> O <sub>2</sub> + .25 OH + .25 HO <sub>2</sub> | 7.86E-15*EXP(-1913./temp) | Pöschl et al. (2000)    |
| G4501 | TrGC   | ISOP + OH → ISO2                                                                                                                                                                                               | 2.54E-11*EXP(410./temp)   | Pöschl et al. (2000)    |
| G4502 | TrGNC  | ISOP + NO <sub>3</sub> → ISON                                                                                                                                                                                  | 3.03E-12*EXP(-446./temp)  | Pöschl et al. (2000)    |
| G4503 | TrGC   | ISO2 + HO <sub>2</sub> → ISOOH                                                                                                                                                                                 | 2.22E-13*EXP(1300./temp)  | Boyd et al. (2003)*     |
| G4504 | TrGNC  | ISO2 + NO → .88 NO <sub>2</sub> + .88 MVK + .88 HCHO + .88 HO <sub>2</sub> + .12 ISON                                                                                                                          | 2.54E-12*EXP(360./temp)   | Pöschl et al. (2000)*   |
| G4505 | TrGC   | ISO2 + CH <sub>3</sub> O <sub>2</sub> → .5 MVK + 1.25 HCHO + HO <sub>2</sub> + .25 CH <sub>3</sub> COCHO + .25 CH <sub>3</sub> COCH <sub>2</sub> OH + .25 CH <sub>3</sub> OH                                   | 2.E-12                    | von Kuhlmann (2001)     |
| G4506 | TrGC   | ISO2 + ISO2 → 2 MVK + HCHO + HO <sub>2</sub>                                                                                                                                                                   | 2.E-12                    | Pöschl et al. (2000)    |
| G4507 | TrGC   | ISOOH + OH → MVK + OH                                                                                                                                                                                          | 1.E-10                    | Pöschl et al. (2000)    |
| G4508 | TrGNC  | ISON + OH → CH <sub>3</sub> COCH <sub>2</sub> OH + NACA                                                                                                                                                        | 1.3E-11                   | Pöschl et al. (2000)    |
| G0004 | TrG    | HO <sub>2</sub> → Dummy                                                                                                                                                                                        | Khet_H02*DUSTYESNO        | see note                |
| G0008 | TrG    | H <sub>2</sub> O <sub>2</sub> → Dummy                                                                                                                                                                          | Khet_H202*DUSTYESNO       | see note                |

\*Notes:

G2110: The rate constant is:  $k_{H02\_H02} = (1.5E-12*EXP(19./temp)+1.7E-33*EXP(1000./temp)*zcon)*(1.0\_dp+1.4E-21*EXP(2200./temp)*C(KPP\_H20))$ . The value for the first (pressure-independent) part is from Christensen et al. (2002), the water term from Kircher and Sander (1984)

G3109: The rate constant is:  $k_{N03\_N02} = k_{3rd}(temp, zcon, 2.0E-30, 4.4, 1.4E-12, 0.7, 0.6)$ .

G3110: The rate constant is defined as backward reaction divided by equilibrium constant.

G3206: The rate constant is:  $k_{$

HN03\_OH =  $2.4E-14*EXP(460./temp)+1./((1./6.5E-34*EXP(1335./temp)*zcon)+(1./2.7E-17*EXP(2199./temp)))$

G3207: The rate constant is defined as backward reaction divided by equilibrium constant.

G4103: product distribution is from Elrod et al. (2001)

G4107: The rate constant is:  $k_{CH300H\_OH} = 3.8E-12*EXP(200./temp)$

G4109: same temperature dependence assumed as for CH<sub>3</sub>CHO+NO<sub>3</sub>

G4201: product distribution is from von Kuhlmann (2001) (see also Neeb et al. (1998))

G4206: Rate coefficient calculated by von Kuhlmann (pers. comm. 2004) using self reactions of CH<sub>3</sub>OO and C<sub>2</sub>H<sub>5</sub>OO from Sander et al. (2003) and geometric mean as suggested by Madronich and Calvert (1990) and Kirchner and Stockwell (1996). The product distribution (branching=0.5/0.25/0.25) is calculated by von Kuhlmann (pers. comm. 2004) based on Villenave and Lesclaux (1996) and Tyndall et al. (2001).

G4207: same value as for G4107: CH<sub>3</sub>OOH+OH assumed

G4213: The rate constant is:  $k_{PA\_N02} = k_{3rd}(temp, zcon, 8.5E-29, 6.5, 1.1E-11, 1.0, 0.6)$ .

G4216:  $1.0\text{E-}11$  from Atkinson et al. (1999), temperature dependence from Kirchner and Stockwell (1996)

G4218: same value as for G4107:  $\text{CH}_3\text{OOH}+\text{OH}$  assumed

G4219: according to Pöschl et al. (2000), the same value as for  $\text{CH}_3\text{CHO}+\text{OH}$  can be assumed

G4220: 50% of the upper limit given by Sander et al. (2003), as suggested by von Kuhlmann (2001)

G4221: The rate constant is:  $k_{\text{PAN}_M} = k_{\text{PA}_N\text{O}_2} / 9.\text{E-}29 * \text{EXP}(-14000./\text{temp})$ , i.e. the rate constant is defined as backward reaction divided by equilibrium constant.

G4301: product distribution is for terminal olefin carbons from Zaveri and Peters (1999)

G4304: The rate constant is:  $k_{\text{PrO}_2\text{H}_2\text{O}_2} = 1.9\text{E-}13 * \text{EXP}(1300./\text{temp})$ . Value for generic  $\text{RO}_2 + \text{HO}_2$  reaction from Atkinson (1997) is used.

G4305: The rate constant is:  $k_{\text{PrO}_2\text{NO}} = 2.7\text{E-}12 * \text{EXP}(360./\text{temp})$

G4306: The rate constant is:  $k_{\text{PrO}_2\text{CH}_3\text{O}_2} = 9.46\text{E-}14 * \text{EXP}(431./\text{temp})$ . The product distribution is from von Kuhlmann (2001).

G4307: same value as for G4107:  $\text{CH}_3\text{OOH}+\text{OH}$  assumed

G4309: products are from von Kuhlmann (2001)

G4315: same value as for G4107:  $\text{CH}_3\text{OOH}+\text{OH}$  assumed

G4319: same value as for PAN assumed

G4401: same value as for propyl group assumed ( $k_{\text{PrO}_2\text{CH}_3\text{O}_2}$ )

G4402: same value as for propyl group assumed ( $k_{\text{PrO}_2\text{H}_2\text{O}_2}$ )

G4403: same value as for propyl group assumed ( $k_{\text{PrO}_2\text{NO}}$ )

G4404: same value as for G4107:  $\text{CH}_3\text{OOH}+\text{OH}$  assumed

G4409: The factor 0.25 was recommended by Uli Poeschl (pers. comm. 2004).

G4414: same value as for propyl group assumed ( $k_{\text{PrO}_2\text{H}_2\text{O}_2}$ )

G4415: same value as for propyl group assumed ( $k_{\text{PrO}_2\text{NO}}$ )

G4416: same value as for G4107:  $\text{CH}_3\text{OOH}+\text{OH}$  assumed

G4417: value for  $\text{C}_4\text{H}_9\text{ONO}_2$  used here

G4503: same temperature dependence assumed as for other  $\text{RO}_2+\text{HO}_2$  reactions

G4504: Yield of 12 %  $\text{RONO}_2$  assumed as suggested in Table 2 of Sprengnether et al. (2002).

G0004: Heterogeneous removal reaction of  $\text{HO}_2$  on mineral dust aerosol. The calculation of the removal rate is described in the accompanying paper.

G0008: Heterogeneous removal reaction of  $\text{H}_2\text{O}_2$  on mineral dust aerosol. The calculation of the removal rate is described in the accompanying paper.

Table 2: Photolysis reactions

| #      | labels  | reaction                                                                                                         | rate constant                | reference |
|--------|---------|------------------------------------------------------------------------------------------------------------------|------------------------------|-----------|
| J1001a | StTrGJ  | $O_3 + h\nu \rightarrow O(^1D)$                                                                                  | J_01D                        | see note  |
| J1001b | StTrGJ  | $O_3 + h\nu \rightarrow O(^3P)$                                                                                  | J_03P                        | see note  |
| J2101  | StTrGJ  | $H_2O_2 + h\nu \rightarrow 2 OH$                                                                                 | J_H2O2                       | see note  |
| J3101  | StTrGNJ | $NO_2 + h\nu \rightarrow NO + O(^3P)$                                                                            | J_NO2                        | see note  |
| J3103a | StTrGNJ | $NO_3 + h\nu \rightarrow NO_2 + O(^3P)$                                                                          | J_NO20                       | see note  |
| J3103b | StTrGNJ | $NO_3 + h\nu \rightarrow NO$                                                                                     | J_NO02                       | see note  |
| J3104  | StTrGNJ | $N_2O_5 + h\nu \rightarrow NO_2 + NO_3$                                                                          | J_N205                       | see note  |
| J3200  | TrGJ    | $HONO + h\nu \rightarrow NO + OH$                                                                                | J_HONO                       | see note  |
| J3201  | StTrGNJ | $HNO_3 + h\nu \rightarrow NO_2 + OH$                                                                             | J_HNO3                       | see note  |
| J3202  | StTrGNJ | $HNO_4 + h\nu \rightarrow .667 NO_2 + .667 HO_2 + .333 NO_3 + .333 OH$                                           | J_HNO4                       | see note  |
| J4100  | StTrGJ  | $CH_3OOH + h\nu \rightarrow HCHO + OH + HO_2$                                                                    | J_CH300H                     | see note  |
| J4101a | StTrGJ  | $HCHO + h\nu \rightarrow H_2 + CO$                                                                               | J_COH2                       | see note  |
| J4101b | StTrGJ  | $HCHO + h\nu \rightarrow H + CO + HO_2$                                                                          | J_CHOH                       | see note  |
| J4200  | TrGCJ   | $C_2H_5OOH + h\nu \rightarrow CH_3CHO + HO_2 + OH$                                                               | J_CH300H                     | see note  |
| J4201  | TrGCJ   | $CH_3CHO + h\nu \rightarrow CH_3O_2 + HO_2 + CO$                                                                 | J_CH3CHO                     | see note  |
| J4202  | TrGCJ   | $CH_3C(O)OOH + h\nu \rightarrow CH_3O_2 + OH$                                                                    | J_PAH                        | see note  |
| J4203  | TrGNCJ  | $NACA + h\nu \rightarrow NO_2 + HCHO + CO$                                                                       | 0.19*J_CHOH                  | see note  |
| J4204  | TrGNCJ  | $PAN + h\nu \rightarrow CH_3C(O)OO + NO_2$                                                                       | J_PAN                        | see note  |
| J4300  | TrGCJ   | $C_3H_7OOH + h\nu \rightarrow CH_3COCH_3 + HO_2 + OH$                                                            | J_CH300H                     | see note  |
| J4301  | TrGCJ   | $CH_3COCH_3 + h\nu \rightarrow CH_3C(O)OO + CH_3O_2$                                                             | J_CH3COCH3                   | see note  |
| J4302  | TrGCJ   | $CH_3COCH_2OH + h\nu \rightarrow CH_3C(O)OO + HCHO + HO_2$                                                       | 0.074*J_CHOH                 | see note  |
| J4303  | TrGCJ   | $CH_3COCHO + h\nu \rightarrow CH_3C(O)OO + CO + HO_2$                                                            | J_CH3COCHO                   | see note  |
| J4304  | TrGCJ   | $CH_3COCH_2O_2H + h\nu \rightarrow CH_3C(O)OO + HO_2 + OH$                                                       | J_CH300H                     | see note  |
| J4305  | TrGNCJ  | $MPAN + h\nu \rightarrow CH_3COCH_2OH + NO_2$                                                                    | J_PAN                        | see note  |
| J4306  | TrGNCJ  | $C_3H_7ONO_2 + h\nu \rightarrow CH_3COCH_3 + NO_2 + HO_2$                                                        | 3.7*J_PAN                    | see note  |
| J4400  | TrGCJ   | $C_4H_9OOH + h\nu \rightarrow OH + .67 CH_3COC_2H_5 + .67 HO_2 + .33 C_2H_5O_2 + .33 CH_3CHO$                    | J_CH300H                     | see note  |
| J4401  | TrGCJ   | $MVK + h\nu \rightarrow CH_3C(O)OO + HCHO + CO + HO_2$                                                           | 0.019*J_COH2+.015*J_CH3COCHO | see note  |
| J4402  | TrGCJ   | $MVKOOH + h\nu \rightarrow OH + .5 CH_3COCHO + .25 CH_3COCH_2OH + .75 HCHO + .75 HO_2 + .25 CH_3C(O)OO + .25 CO$ | J_CH300H                     | see note  |
| J4403  | TrGCJ   | $CH_3COC_2H_5 + h\nu \rightarrow CH_3C(O)OO + C_2H_5O_2$                                                         | 0.42*J_CHOH                  | see note  |
| J4404  | TrGCJ   | $MEKOOH + h\nu \rightarrow CH_3C(O)OO + CH_3CHO + OH$                                                            | J_CH300H                     | see note  |
| J4405  | TrGCJ   | $MeCOCO + h\nu \rightarrow 2 CH_3C(O)OO$                                                                         | 2.15*J_CH3COCHO              | see note  |

Table 2: Photolysis reactions (... continued)

| #     | labels | reaction                                                                                                                                                                | rate constant         | reference |
|-------|--------|-------------------------------------------------------------------------------------------------------------------------------------------------------------------------|-----------------------|-----------|
| J4406 | TrGNCJ | $\text{ONIT} + h\nu \rightarrow \text{NO}_2 + .67 \text{CH}_3\text{COC}_2\text{H}_5 + .67 \text{HO}_2 + .33 \text{C}_2\text{H}_5\text{O}_2 + .33 \text{CH}_3\text{CHO}$ | $3.7 * \text{J\_PAN}$ | see note  |
| J4500 | TrGCJ  | $\text{ISOOH} + h\nu \rightarrow \text{MVK} + \text{HCHO} + \text{HO}_2 + \text{OH}$                                                                                    | $\text{J\_CH300H}$    | see note  |
| J4501 | TrGNCJ | $\text{ISON} + h\nu \rightarrow \text{MVK} + \text{HCHO} + \text{NO}_2 + \text{HO}_2$                                                                                   | $3.7 * \text{J\_PAN}$ | see note  |

\*Notes: J-values are calculated with an external module and then supplied to the MECCA chemistry



## References

- Atkinson, R.: Gas-phase tropospheric chemistry of volatile organic compounds: 1. Alkanes and alkenes, *J. Phys. Chem. Ref. Data*, 26, 215–290, 1997.
- Atkinson, R.: Kinetics of the gas-phase reactions of OH radicals with alkanes and cycloalkanes, *Atmos. Chem. Phys.*, 3, 2233–2307, 2003.
- Atkinson, R., Baulch, D. L., Cox, R. A., Hampson, Jr., R. F., Kerr, J. A., Rossi, M. J., and Troe, J.: Summary of evaluated kinetic and photochemical data for atmospheric chemistry: Web version August 1999, <http://www.iupac-kinetic.ch.cam.ac.uk/>, 1999.
- Boyd, A. A., Flaud, P.-M., Daugey, N., and Lesclaux, R.: Rate constants for  $\text{RO}_2 + \text{HO}_2$  reactions measured under a large excess of  $\text{HO}_2$ , *J. Phys. Chem. A*, 107, 818–821, 2003.
- Canosa-Mas, C. E., King, M. D., Lopez, R., Percival, C. J., Wayne, R. P., Shallcross, D. E., Pyle, J. A., and Daele, V.: Is the reaction between  $\text{CH}_3(\text{O})\text{O}_2$  and  $\text{NO}_3$  important in the night-time troposphere?, *J. Chem. Soc. Faraday Trans.*, 92, 2211–2222, 1996.
- Christensen, L. E., Okumura, M., Sander, S. P., Salawitch, R. J., Toon, G. C., Sen, B., Blavier, J.-F., and Jucks, K. W.: Kinetics of  $\text{HO}_2 + \text{HO}_2 \rightarrow \text{H}_2\text{O}_2 + \text{O}_2$ : Implications for stratospheric  $\text{H}_2\text{O}_2$ , *Geophys. Res. Lett.*, 29, doi:10.1029/2001GL014525, 2002.
- Elrod, M. J., Ranschaert, D. L., and Schneider, N. J.: Direct kinetics study of the temperature dependence of the  $\text{CH}_2\text{O}$  branching channel for the  $\text{CH}_3\text{O}_2 + \text{HO}_2$  reaction, *Int. J. Chem. Kinetics*, 33, 363–376, 2001.
- Kircher, C. C. and Sander, S. P.: Kinetics and mechanism of  $\text{HO}_2$  and  $\text{DO}_2$  disproportionations, *J. Phys. Chem.*, 88, 2082–2091, 1984.
- Kirchner, F. and Stockwell, W. R.: Effect of peroxy radical reactions on the predicted concentrations of ozone, nitrogenous compounds, and radicals, *J. Geophys. Res.*, 101D, 21 007–21 022, 1996.
- Madronich, S. and Calvert, J. G.: Permutation reactions of organic peroxy radicals in the troposphere, *J. Geophys. Res.*, 95D, 5697–5715, 1990.
- McCabe, D. C., Gierczak, T., Talukdar, R. K., and Ravishankara, A. R.: Kinetics of the reaction  $\text{OH} + \text{CO}$  under atmospheric conditions, *Geophys. Res. Lett.*, 28, 3135–3138, 2001.
- Müller, J.-F. and Brasseur, G.: IMAGES: A three-dimensional chemical transport model of the global troposphere, *J. Geophys. Res.*, 100D, 16 445–16 490, 1995.
- Neeb, P., Horie, O., and Moortgat, G. K.: The ethene-ozone reaction in the gas phase, *J. Phys. Chem. A*, 102, 6778–6785, 1998.
- Orlando, J. J., Tyndall, G. S., Bertman, S. B., Chen, W., and Burkholder, J. B.: Rate coefficient for the reaction of OH with  $\text{CH}_2=\text{C}(\text{CH}_3)\text{C}(\text{O})\text{OONO}_2$  (MPAN), *Atmos. Environ.*, 36, 1895–1900, 2002.
- Pöschl, U., von Kuhlmann, R., Poisson, N., and Crutzen, P. J.: Development and intercomparison of condensed isoprene oxidation mechanisms for global atmospheric modeling, *J. Atmos. Chem.*, 37, 29–52, 2000.
- Sander, S. P., Finlayson-Pitts, B. J., Friedl, R. R., Golden, D. M., Huie, R. E., Kolb, C. E., Kurylo, M. J., Molina, M. J., Moortgat, G. K., Orkin, V. L., and Ravishankara, A. R.: Chemical Kinetics and Photochemical Data for Use in Atmospheric Studies, Evaluation Number 14, JPL Publication 02-25, Jet Propulsion Laboratory, Pasadena, CA, 2003.
- Sivakumaran, V., Hölscher, D., Dillon, T. J., and Crowley, J. N.: Reaction between OH and HCHO: temperature dependent rate coefficients (202–399 K) and product pathways (298 K), *Phys. Chem. Chem. Phys.*, 5, 4821–4827, 2003.
- Sprengnether, M., Demerjian, K. L., Donahue, N. M., and Anderson, J. G.: Product analysis of the OH oxidation of isoprene and 1,3-butadiene in the presence of NO, *J. Geophys. Res.*, 107D, doi:10.1029/2001JD000716, 2002.
- Tyndall, G. S., Staffelbach, T. A., Orlando, J. J., and Calvert, J. G.: Rate coefficients for the reactions of OH radicals with methylglyoxal and acetaldehyde, *Int. J. Chem. Kinetics*, 27, 1009–1020, 1995.
- Tyndall, G. S., Cox, R. A., Granier, C., Lesclaux, R., Moortgat, G. K., Pilling, M. J., Ravishankara, A. R., and Wallington, T. J.: The atmospheric chemistry of small organic peroxy radicals, *J. Geophys. Res.*, 106D, 12 157–12 182, 2001.
- Villenave, E. and Lesclaux, R.: Kinetics of the cross reactions of  $\text{CH}_3\text{O}_2$  and  $\text{C}_2\text{H}_5\text{O}_2$  radicals with selected peroxy radicals, *J. Phys. Chem.*, 100, 14 372–14 382, 1996.
- von Kuhlmann, R.: Tropospheric photochemistry of ozone, its precursors and the hydroxyl radical: A 3D-modeling study considering non-methane hydrocarbons, Ph.D. thesis, Johannes Gutenberg-Universität, Mainz, Germany, 2001.
- Zaveri, R. A. and Peters, L. K.: A new lumped structure photochemical mechanism for large-scale applications, *J. Geophys. Res.*, 104D, 30 387–30 415, 1999.
